# Supplementary material
Source: publisher figshare collection journal article supplement (https://karger.figshare.com/ndownloader/files/30663749)
Supplement: Supplementary file 1 [file 30663749]

**Supplemental Table 2.** Additional comparisons of 35 patients with chronic kidney disease with 400 normotensive subjects and 253 medicated hypertensive patients. The values are numbers and percentages or means and 95% confidence intervals.

|                                      |                                | Normotensive<br>(n=400) | Medicated<br>hypertensive<br>(n=253) | CKD5 and 5D<br>(n=35) |
|--------------------------------------|--------------------------------|-------------------------|--------------------------------------|-----------------------|
| Male                                 |                                | 178 (45%)               | 167 (66%)*                           | 22 (63%)*             |
| Smoking                              | Present                        | 57 (14%)                | 36 (14%)                             | 6 (17%)               |
|                                      | Previous                       | 106 (27%)               | 85 (34%)                             | 8 (23%)               |
| Diabetics                            |                                | 2 (0%)                  | 54 (21%)*                            | 10 (29%)*             |
| Age (years)                          |                                | 44 (43, 45)             | 54 (53, 55)*                         | 56 (51, 61)*          |
| Body mass index (kg/m <sup>2</sup> ) |                                | 26 (25, 26)             | 30 (29, 31)*                         | 26 (25, 28)†          |
| Mean systolic BP                     |                                | 119 (118, 120)          | 144 (142, 146)*                      | 138 (132, 145)*       |
| Mean diastolic BP                    |                                | 70 (70, 71)             | 85 (83, 86)*                         | 76 (73,79)*†          |
| Unadjusted PWV (m/s)                 |                                | 7.9 (7.7, 8.1)          | 9.4 (9.2, 9.6)*                      | 9.8 (9.2, 10.4)*      |
| Fasting plasma                       |                                |                         |                                      |                       |
|                                      | HDL cholesterol (mmol/l)       | 1.6 (1.6, 1.7)          | 1.4 (1.3, 1.4)*                      | 1.2 (1.0, 1.4)*       |
|                                      | LDL cholesterol (mmol/l)       | 2.9 (2.8, 2.9)          | 3.0 (2.9, 3.2)*                      | 2.3 (2.0, 2.6)*†      |
|                                      | Triglycerides (mmol/l)         | 1.1 (1.1, 1.2)          | 1.5 (1.4, 1.6)*                      | 1.7 (1.2, 2.2)*       |
|                                      | Atherogenic index of<br>plasma | -0.20 (-0.23, -0.17)    | -0.01 (-0.05, 0.03)*                 | 0.08 (-0.05, 0.22)*   |

BP, blood pressure; CKD5 and 5D, chronic kidney disease stage 5 and 5D; PWV, pulse wave velocity; HDL, high-density lipoprotein; LDL, low-density lipoprotein. Atherogenic index of plasma is defined as  $\log_{10}(\text{plasma triglyceride}/\text{HDL cholesterol})$  [1]. Analysis of variances with the Bonferroni correction in the post-hoc analyses was performed for continuous variables and the  $\chi^2$ -test for categorical variables. \* $p < 0.05$  compared with normotensive; † $p < 0.05$  compared with medicated hypertensive.

- 1 Dobiášová M. Atherogenic index of plasma [Log(triglycerides/HDL-cholesterol)]: theoretical and practical Implications. Clinical Chemistry. 2004 Jul;50(7):1113–5.
